# Supplementary material for: Modulation of Toll-like receptor 1 intracellular domain structure and activity by Zn2+ ions
Source: PubMed Central journal article supplement (PMC8385042; doi:10.1038/s42003-021-02532-0), 2021-08-24
Supplement: 42003_2021_2532_MOESM3_ESM.pdf [file 42003_2021_2532_MOESM3_ESM.pdf]

## **Description of Additional Supplementary Files**

**File name:** Supplementary Data 1

**Description:** The raw data from functional assay.
